# Supplementary material
Source: PubMed Central journal article supplement (PMC3620422)

Figure S1. Flynn et al

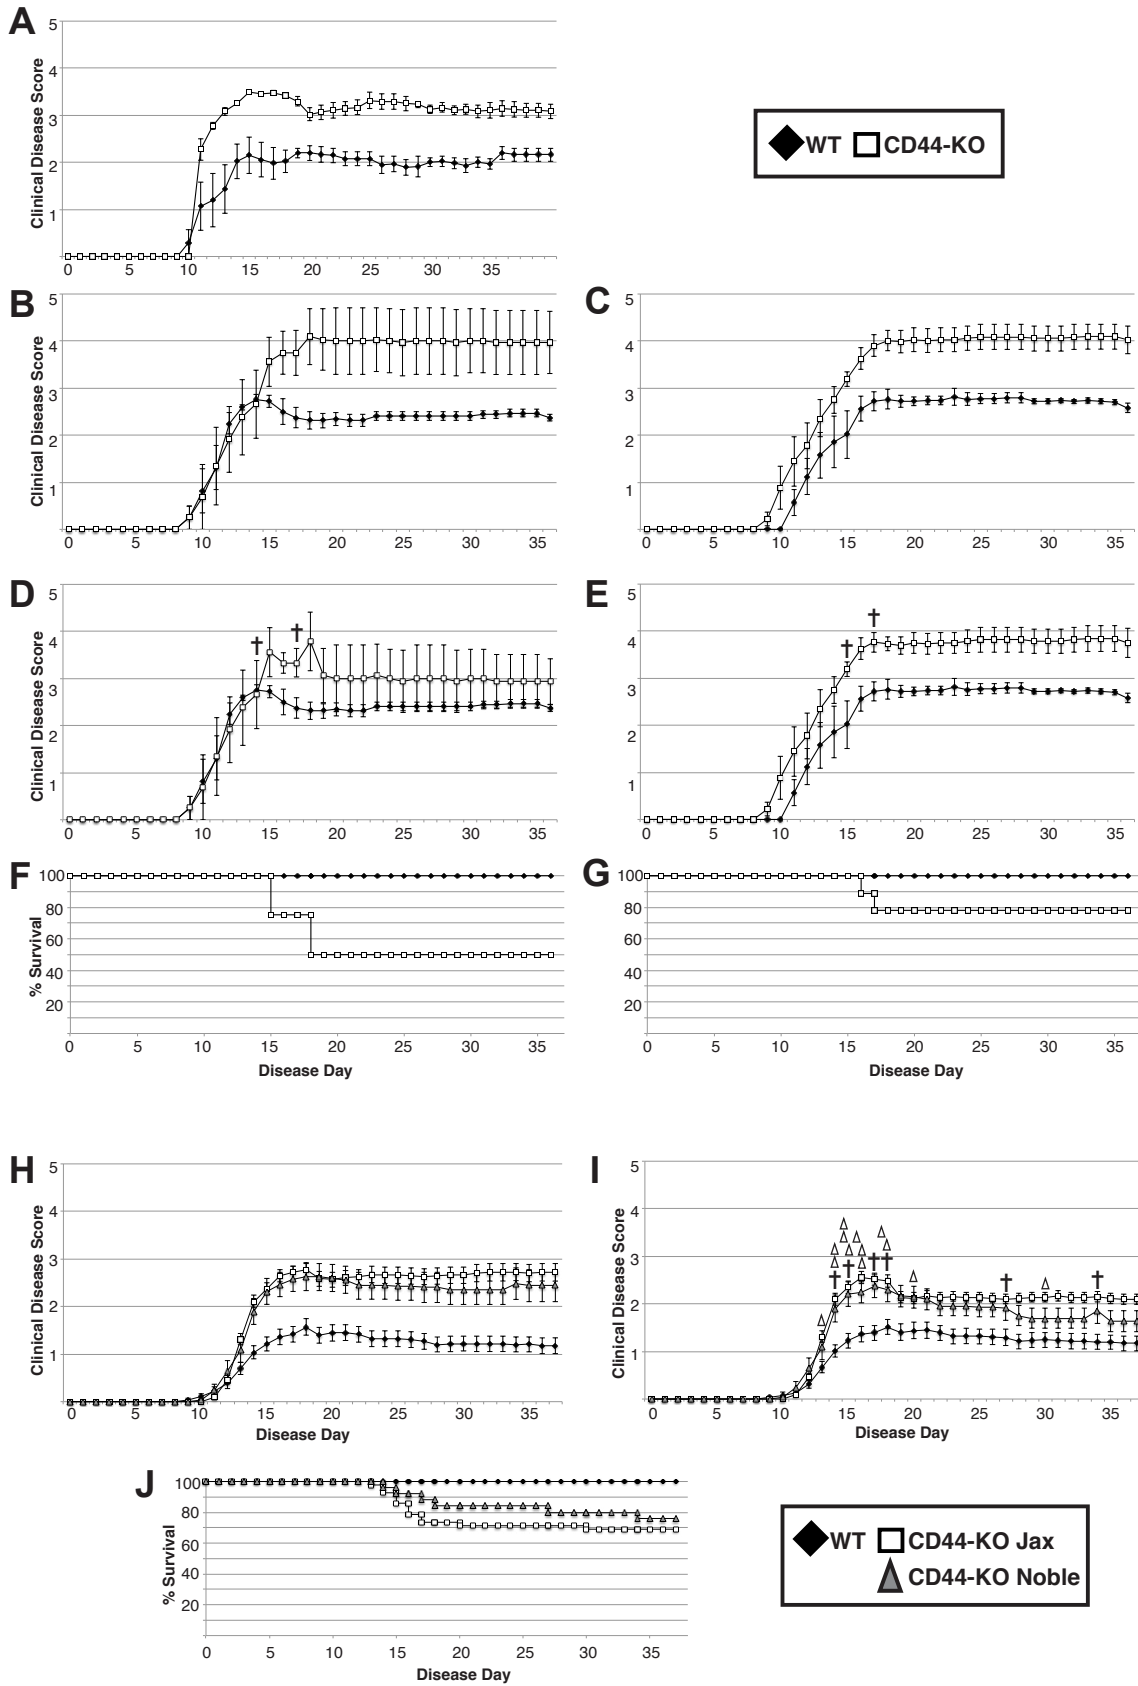

Supplement: mmc1.pdf [file mmc1.pdf]

Figure S2. Flynn et al

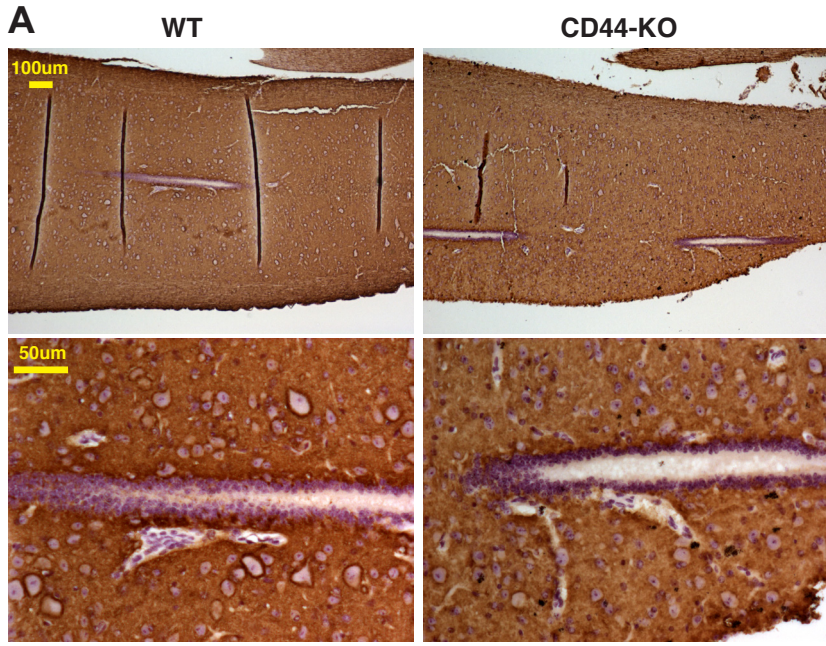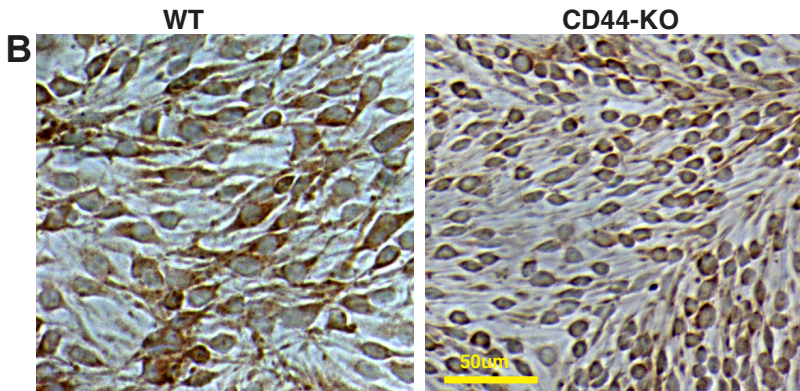

Supplement: mmc2.pdf [file mmc2.pdf]
